# Supplementary material for: Association between Taxonomic Composition of Gut Microbiota and Host Single Nucleotide Polymorphisms in Crohn’s Disease Patients from Russia
Source: MDPI journal article supplement (doi:10.3390/ijms24097998), 2023-04-28
Supplement: s1 [file s1]

**Supplementary Table S1.** Statistically significant differences in the gut microbiota of CD patients with different community types.

|                             | mean±SD          |                   | P value<br>(Kruskal-Wallis test) |
|-----------------------------|------------------|-------------------|----------------------------------|
|                             | Community type I | Community type II |                                  |
| Diversity                   |                  |                   |                                  |
| N OTUs                      | 1576.34±577.62   | 679.83±319.72     | <0.001                           |
| Shannon's index             | 7.09±0.76        | 5.33±0.99         | <0.001                           |
| Phylum (%)                  |                  |                   |                                  |
| <i>Bacteroidetes</i>        | 22.60±15.96      | 14.86±19.21       | 0.002                            |
| <i>Fusobacteria</i>         | 0.03±0.15        | 1.42±3.13         | 0.016                            |
| <i>Proteobacteria</i>       | 3.43±4.13        | 13.96±15.23       | <0.001                           |
| <i>Tenericutes</i>          | 0.22±0.66        | 0.01±0.06         | <0.001                           |
| <i>Verrucomicrobia</i>      | 0.99±2.63        | 2.29±9.04         | 0.004                            |
| Family (%)                  |                  |                   |                                  |
| <i>Corynebacteriaceae</i>   | 0.002±0.005      | 0.02±0.05         | 0.010                            |
| <i>Micrococcaceae</i>       | 0.01±0.02        | 0.08±0.14         | <0.001                           |
| <i>Nocardiaceae</i>         | 0.00±0.00        | 0.002±0.01        | 0.021                            |
| <i>Coriobacteriaceae</i>    | 2.12±1.87        | 1.68±3.00         | <0.001                           |
| <i>o__Bacteroidales;f__</i> | 0.34±1.67        | 0.14±0.79         | <0.001                           |
| <i>Bacteroidaceae</i>       | 13.86±12.46      | 10.42±15.41       | 0.002                            |
| <i>Porphyromonadaceae</i>   | 1.34±1.63        | 1.46±3.05         | <0.001                           |
| <i>Prevotellaceae</i>       | 3.80±7.64        | 1.05±2.37         | 0.001                            |
| <i>Rikenellaceae</i>        | 1.49±1.82        | 0.54±1.05         | <0.001                           |
| <i>[Barnesiellaceae]</i>    | 0.61±1.44        | 0.26±0.88         | <0.001                           |
| <i>[Odoribacteraceae]</i>   | 0.33±0.46        | 0.26±0.53         | 0.001                            |
| <i>[Paraprevotellaceae]</i> | 0.45±0.68        | 0.58±2.10         | <0.001                           |
| <i>Bacillaceae</i>          | 0.01±0.01        | 0.04±0.10         | 0.001                            |
| <i>Staphylococcaceae</i>    | 0.01±0.03        | 0.01±0.03         | 0.006                            |
| <i>Gemellaceae</i>          | 0.01±0.03        | 0.06±0.16         | 0.016                            |
| <i>Aerococcaceae</i>        | 0.0002±0.001     | 0.003±0.01        | 0.017                            |

|                                           |              |              |        |
|-------------------------------------------|--------------|--------------|--------|
| <i>Carnobacteriaceae</i>                  | 0.01±0.02    | 0.11±0.32    | <0.001 |
| <i>Enterococcaceae</i>                    | 0.30±0.95    | 4.89±8.80    | 0.012  |
| <i>Streptococcaceae</i>                   | 2.86±4.15    | 8.10±13.92   | 0.024  |
| <i>o__Clostridiales;Other</i>             | 1.06±1.16    | 0.30±0.46    | <0.001 |
| <i>o__Clostridiales;f__</i>               | 3.36±2.61    | 0.80±1.20    | <0.001 |
| <i>Christensenellaceae</i>                | 0.47±1.18    | 0.06±0.33    | <0.001 |
| <i>Dehalobacteriaceae</i>                 | 0.01±0.01    | 0.002±0.01   | <0.001 |
| <i>Lachnospiraceae</i>                    | 24.33±10.84  | 20.82±21.49  | 0.015  |
| <i>Peptococcaceae</i>                     | 0.05±0.14    | 0.001±0.002  | <0.001 |
| <i>Ruminococcaceae</i>                    | 23.58±9.56   | 6.46±8.27    | <0.001 |
| <i>[Mogibacteriaceae]</i>                 | 0.18±0.23    | 0.05±0.09    | <0.001 |
| <i>Erysipelotrichaceae</i>                | 2.85±2.82    | 1.90±3.08    | 0.001  |
| <i>Leptotrichiaceae</i>                   | 0.0001±0.001 | 0.07±0.41    | 0.013  |
| <i>Victivallaceae</i>                     | 0.01±0.03    | 0.002±0.01   | 0.021  |
| <i>c__Alphaproteobacteria;o__RF32;f__</i> | 0.12±0.34    | 0.03±0.11    | <0.001 |
| <i>Alcaligenaceae</i>                     | 0.49±0.68    | 1.10±2.14    | 0.034  |
| <i>Desulfovibrionaceae</i>                | 0.18±0.22    | 0.26±0.78    | <0.001 |
| <i>Enterobacteriaceae</i>                 | 2.23±4.00    | 10.29±14.62  | <0.001 |
| <i>Legionellaceae</i>                     | 0.00±0.00    | 0.002±0.01   | 0.021  |
| <i>Halomonadaceae</i>                     | 0.0002±0.001 | 0.001±0.004  | 0.049  |
| <i>Pseudomonadaceae</i>                   | 0.001±0.002  | 0.003±0.01   | 0.047  |
| <i>Anaeroplasmataceae</i>                 | 0.14±0.64    | 0.01±0.06    | 0.001  |
| <i>[Cerasiococcaceae]</i>                 | 0.02±0.09    | 0.0001±0.001 | 0.027  |
| <i>Verrucomicrobiaceae</i>                | 0.97±2.63    | 2.29±9.04    | 0.010  |

**Supplementary Table S2.** Inclusion/exclusion criteria for CD patients and healthy subjects.

|                                                                                                                                                                                                                                                                                                                                                                                                                                                                                                                                                                                                                                                                                                                                                                                                                                                                                                                                                                        |
|------------------------------------------------------------------------------------------------------------------------------------------------------------------------------------------------------------------------------------------------------------------------------------------------------------------------------------------------------------------------------------------------------------------------------------------------------------------------------------------------------------------------------------------------------------------------------------------------------------------------------------------------------------------------------------------------------------------------------------------------------------------------------------------------------------------------------------------------------------------------------------------------------------------------------------------------------------------------|
| <p><b>Inclusion criteria for CD patients:</b></p> <ul style="list-style-type: none"> <li>• m/f, 18-60 years old</li> <li>• CD diagnosis established by clinical and endoscopic evidence, corroborated by histopathological findings</li> </ul>                                                                                                                                                                                                                                                                                                                                                                                                                                                                                                                                                                                                                                                                                                                         |
| <p><b>Exclusion criteria for CD patients:</b></p> <ul style="list-style-type: none"> <li>• Presence of concomitant diseases/conditions which can lead to sufficient changes of the gut microbiota (e.g., oncological pathology, and prior GI surgery)</li> <li>• The subject has identified congenital or acquired immunodeficiency</li> <li>• Extensive colonic resection, or <math>\geq 3</math> small bowel resections, or short bowel syndrome. Ileostomy or colostomy</li> <li>• The subject has a history or evidence of colonic mucosal dysplasia</li> <li>• <i>C. difficile</i> infection or clinically significant infections, including viral hepatitis, tuberculosis, pneumonia</li> <li>• Intake of prebiotics or/and probiotics within 3 months prior to the visit for biosample collection; antibiotics within 6 months prior to the visit for biosample collection</li> <li>• Pregnancy or breastfeeding</li> </ul>                                     |
| <p><b>Inclusion criteria for healthy volunteers:</b></p> <ul style="list-style-type: none"> <li>• m/f, 18-60 years old</li> </ul>                                                                                                                                                                                                                                                                                                                                                                                                                                                                                                                                                                                                                                                                                                                                                                                                                                      |
| <p><b>Exclusion criteria for healthy volunteers:</b></p> <ul style="list-style-type: none"> <li>• Presence of concomitant diseases/conditions which can lead to sufficient changes of the gut microbiota (e.g., oncological pathology, and prior GI surgery)</li> <li>• Presence of chronic decompensated cardiovascular, respiratory, liver, kidney, or endocrine diseases</li> <li>• The subject has identified congenital or acquired immunodeficiency</li> <li>• <i>C. difficile</i> infection or clinically significant infections, including viral hepatitis, tuberculosis, pneumonia</li> <li>• Presence of diarrhea (stool frequency more than 3 times a day) within at least 3 consecutive days during the last month</li> <li>• Intake of prebiotics or/and probiotics within 3 months prior to the visit for biosample collection; antibiotics within 6 months prior to the visit for biosample collection</li> <li>• Pregnancy or breastfeeding</li> </ul> |

**Supplementary Table S3. Studied SNPs**

| #  | SNP                  | Gene            | PCR primers                     |
|----|----------------------|-----------------|---------------------------------|
| 1  | rs2241880 [110–112]  | <i>ATG16L1</i>  | 5'-AGGAGACGCTCTGTCTCTTCC-3'     |
|    |                      |                 | 5'-CACTTCTTTACCAGAACCAGGATG-3'  |
| 2  | Rs9858542 [27–29]    | <i>BSN</i>      | 5'-GGAGAGCGTGTTCTCCAAGAT-3'     |
|    |                      |                 | 5'-CCAGTTGCAGGCAGTGCATA-3'      |
| 3  | rs6908425 [113,114]  | <i>CDKAL1</i>   | 5'-GGTGACACCCACAAAAGAAAAAGA-3'  |
|    |                      |                 | 5'-TGCCCTAAGCTAGGGGTAC-3'       |
| 4  | rs6596075 [115,116]  | <i>IBD5</i>     | 5'-GACCTGAAGAGCTCTGCCTTCAAA-3'  |
|    |                      |                 | 5'-TCACTGAGGTTCAAGTCACCAGC-3'   |
| 5  | rs11805303 [117,118] | <i>IL23R</i>    | 5'-TGTATGCTTGCAAACAGAGAACT-3'   |
|    |                      |                 | 5'-AGATTCCTCTTAGTCGGAGCTTTG-3'  |
| 6  | rs1004819 [119–121]  | <i>IL23R</i>    | 5'-CTGGATTGCACTGACCTGCT-3'      |
|    |                      |                 | 5'-GCACAAGCATTCTAGGACCC-3'      |
| 7  | rs10489629 [122,123] | <i>IL23R</i>    | 5'-AAGCTTGTTTGATTATGATGTCAGC-3' |
|    |                      |                 | 5'-GTCATGCCCAGTTTCCGCTT-3'      |
| 8  | rs11209026 [111,124] | <i>IL23R</i>    | 5'-TGTCAATTCTTTCTTTGATTGGGAT-3' |
|    |                      |                 | 5'-AGAAATTCTGCAAAAACCTACCC-3'   |
| 9  | rs2522057 [125]      | <i>IRF1-AS1</i> | 5'-TTCATTCATGTCCCTGACACA-3'     |
|    |                      |                 | 5'-TGCTCACATCTGCCATCTCA-3'      |
| 10 | rs13361189 [126,127] | <i>IRGM</i>     | 5'-TCTCTCCTCCAAGGCTCCTC-3'      |
|    |                      |                 | 5'-CCCTTTCTAAACTGTACCCGC-3'     |
| 11 | rs4958847 [128,129]  | <i>IRGM</i>     | 5'-CCTCTCACTGGGAGAAGCTTTA-3'    |
|    |                      |                 | 5'-TGCATCACAAATTTCTCCTGTTAGT-3' |
| 12 | rs2274910 [130]      | <i>ITLN1</i>    | 5'-GGAGCCTTTAGGCCATGTCTC-3'     |
|    |                      |                 | 5'-CAGTGCGGAGAAAATACAGGC-3'     |
| 13 | Rs1793004 [33,97]    | <i>NELL1</i>    | 5'-TGGATCAGGGCCACAATCTT-3'      |
|    |                      |                 | 5'-TTATGAAGAACTGGGTTTCCAAGC-3'  |
| 14 | rs2836878 [131–134]  | <i>PSMG1</i>    | 5'-CCAGGCACAAGGACTCTTGA-3'      |
|    |                      |                 | 5'-AGGCTGGGAGAGGAGATGAG-3'      |
| 15 | rs1992662 [97]       | <i>PTGER4</i>   | 5'-TGCACATTGTGAGCACACATAAA-3'   |

|    |                      |                |                                 |
|----|----------------------|----------------|---------------------------------|
|    |                      |                | 5'-TGGTTTCCTTCTATACATATCCGT-3'  |
| 16 | rs8111071 [135]      | <i>RSPH6A</i>  | 5'-CACGCATGACCCTGCAATAC-3'      |
|    |                      |                | 5'-TCTGTTGAACCAATGAATGGATGG-3'  |
| 17 | Rs2631367 [136–138]  | <i>SLC22A5</i> | 5'-CGCTCTGCCTGCCAGC-3'          |
|    |                      |                | 5'-GCGGCTGGCCTTACATAGG-3'       |
| 18 | Rs3816769 [30,31]    | <i>STAT3</i>   | 5'-GTCCACTGATAGGAAGATGACTCT-3'  |
|    |                      |                | 5'-CTGGTCTTGCAGGGAAGCTA-3'      |
| 19 | rs7753394 [139,140]  | <i>TNFAIP3</i> | 5'-ATCTCTCACCCCTTCTCCTGAAAGA-3' |
|    |                      |                | 5'-GCCCCACATGGTGTAATTTATGC-3'   |
| 20 | rs1456893 [141]      | intergen       | 5'-ATGTGCCTCTGACCATGACA-3'      |
|    |                      |                | 5'-TGCCATGACTAGCTTCTAGGT-3'     |
| 21 | rs224136 [142,143]   | intergen       | 5'-TAATAGGGCTGTTCACTGGA-3'      |
|    |                      |                | 5'-ATTCATCCAAGTGCCCAAGTGA-3'    |
| 22 | rs6601764 [144]      | intergen       | 5'-GGGGGAAGTAGAGAGTTGGAC-3'     |
|    |                      |                | 5'-GGAGCATTCAAGTGTGCTTACA-3'    |
| 23 | rs7807268 [145,146]  | intergen       | 5'-GGAAGGGTGATTTCTCCTGTT-3'     |
|    |                      |                | 5'-CCCTTCGCTACAGACATTGG-3'      |
| 24 | rs12037606 [147,148] | intergen       | 5'-TGACAAGCTTTATCACAGCTGATT-3'  |
|    |                      |                | 5'-TGCCCTAAGCTAGGGGTTAC-3'      |
